# Supplementary material for: Responsive structural adaptability in ultra-microporous frameworks: guest recognition and macroscopic shape transformations induced by spin transitions within single crystals
Source: Royal Society of Chemistry journal article supplement (doi:10.1039/d4qi01511h), 2024-01-01
Supplement: d4qi01511h2.pdf [file d4qi01511h2.pdf]

## Supporting Information

# Responsive Structural Adaptability in Ultra-Microporous Frameworks: Guest recognition and Macroscopic Shape Transformations Induced by Spin Transitions within Single Crystals

Yu-Ting Yang,<sup>a,b</sup> Wei Guo,<sup>a</sup> Yu-Xia Li,<sup>d</sup> Zhi-Kun Liu,<sup>d</sup> Yuqiao Chai,<sup>b,\*</sup> Xing Li,<sup>a</sup> Bao Li,<sup>c,\*</sup> and Jin-Peng Xue<sup>a,\*</sup>

---

<sup>a</sup> Address here. School of Materials Science and Chemical Engineering, Ningbo University, Ningbo, Zhejiang 315211, China.

<sup>b</sup> School of Material and Chemical Engineering, Ningbo University of Technology, Ningbo, Zhejiang 315211, China.

<sup>c</sup> Key Laboratory of Material Chemistry for Energy Conversion and Storage, School of Chemistry and Chemical Engineering, Huazhong University of Science and Technology, Wuhan, Hubei 430074, China

<sup>d</sup> Key Laboratory of Cluster Science of Ministry of Education, School of Chemistry and Chemical Engineering, Beijing Institute of Technology, Beijing 102488, China

Email: [xuejinpeng@nbu.edu.cn](mailto:xuejinpeng@nbu.edu.cn) (J-P.X.); [chaiyuqiao@nbut.edu.cn](mailto:chaiyuqiao@nbut.edu.cn) (Y. Chai); [libao@hust.edu.cn](mailto:libao@hust.edu.cn) (B.L.)

## Table of Contents

|                                                                                                                                                        |     |
|--------------------------------------------------------------------------------------------------------------------------------------------------------|-----|
| Experimental Procedures .....                                                                                                                          | S3  |
| Figure S1   The asymmetric unit of $1 \cdot 2\text{C}_2\text{Cl}_4$ .....                                                                              | S5  |
| Figure S2   The Coordination mode of $\text{Fe}^{2+}$ ions in $1 \cdot 2\text{C}_2\text{Cl}_4$ .....                                                   | S5  |
| Figure S3   The arrangement of $\text{C}_2\text{Cl}_4$ molecules in adjacent layers of $1 \cdot 2\text{C}_2\text{Cl}_4$ .....                          | S5  |
| Figure S4   The asymmetric unit and layer structure of the partially desolvated state .....                                                            | S6  |
| Figure S5   The selected planes of 1 and $1 \cdot 2\text{C}_2\text{Cl}_4$ .....                                                                        | S6  |
| Figure S6   The ABAB-stacked structure of 1 .....                                                                                                      | S7  |
| Figure S7   The $\text{C}-\text{H}^{\delta+} \cdots \text{H}^{\delta-}-\text{B}$ dihydrogen bonds of 1 and $1 \cdot 2\text{C}_2\text{Cl}_4$ .....      | S7  |
| Figure S8   The circular windows of $1 \cdot 2\text{C}_2\text{Cl}_4$ along two directions .....                                                        | S8  |
| Figure S9   $\text{C}_2\text{H}_2$ fit isotherms of 1 at 273 K and 298 K by virial equation .....                                                      | S9  |
| Figure S10   $\text{CO}_2$ fit isotherms of 1 at 273 K and 298 K by virial equation .....                                                              | S9  |
| Figure S11   $\text{C}_2\text{H}_2$ fit isotherm of 1 at 273 and 298 K by L-F model .....                                                              | S9  |
| Figure S12   $\text{CO}_2$ fit isotherm of 1 at 273 and 298 K by L-F model .....                                                                       | S10 |
| Figure S13   The cyclic breakthrough curves for 1/9 binary $\text{C}_2\text{H}_2/\text{CO}_2$ .....                                                    | S10 |
| Figure S14   Thermal hysteresis loop of 5.8 K for 1 .....                                                                                              | S11 |
| Figure S15   The photographs of the free crystal during heating and cooling .....                                                                      | S11 |
| Figure S16   Thermal hysteresis loop for $1 \cdot 2.5\text{CH}_3\text{OH}$ and 1 .....                                                                 | S12 |
| Figure S17   Temperature-dependence of the $\chi_M T$ values of $\text{CH}_3\text{OH}$ (a) and $\text{C}_2\text{Cl}_4$ (b) re-adsorption samples. .... | S13 |
| Figure S18   The face index of single crystal .....                                                                                                    | S13 |
| Figure S19   The rule for dimensioning the free crystal .....                                                                                          | S14 |
| Figure S20   Side-view photographs of the crystal before and after heating and cooling .....                                                           | S14 |
| Figure S21   The static and dynamic units upon macroscopic shape change in the free crystal .....                                                      | S15 |
| Figure S22   The comparison of temperature-dependent unit-cell volume in $1 \cdot 2\text{C}_2\text{Cl}_4$ and 1 .....                                  | S15 |
| Figure S23   The photograph for the free crystal of $1 \cdot 2\text{C}_2\text{Cl}_4$ at 200 (a) and 300 K (b) .....                                    | S16 |
| Figure S24   The side-view photograph of the free crystal of $1 \cdot 2\text{C}_2\text{Cl}_4$ .....                                                    | S16 |
| Table S1   Crystal data and structural refinements for $1 \cdot 2\text{C}_2\text{Cl}_4$ .....                                                          | S17 |
| Table S2   Crystal data and structural refinements for the partially desolvated state .....                                                            | S17 |
| Table S3   The selected distances and angles of DHBs for $1 \cdot 2\text{C}_2\text{Cl}_4$ at 200 K .....                                               | S18 |
| Table S4   The selected distances and angles of DHBs for 1 at 298 K .....                                                                              | S18 |
| Table S5   Single-crystal elastic stiffness constants ( $C_{ij}$ 's) of 1 .....                                                                        | S18 |
| Table S6   Selected bond lengths and angles for $1 \cdot 2\text{C}_2\text{Cl}_4$ at 200 K .....                                                        | S18 |
| Table S7   Selected bond lengths and angles for 1 .....                                                                                                | S19 |
| Table S8   Selected bond lengths and angles for the partially desolvated state .....                                                                   | S19 |
| Table S9   Structural parameters for $1 \cdot \text{C}_2\text{Cl}_4$ , 1, and the partially desolvated state .....                                     | S19 |
| References .....                                                                                                                                       | S19 |

## Experimental Procedures

**[Fe<sup>II</sup>(tpe)(NCBH<sub>3</sub>)<sub>2</sub>]**·**2C<sub>2</sub>Cl<sub>4</sub> (**1**·2C<sub>2</sub>Cl<sub>4</sub>).** A buffer layer consisting of a C<sub>2</sub>Cl<sub>4</sub>/CH<sub>3</sub>OH mixture (4 mL, v/v = 1:1) was slowly added to the tube containing a C<sub>2</sub>Cl<sub>4</sub>/CH<sub>3</sub>OH mixture solution (4 mL, v/v = 3:1) with the tpe ligand (3.35 mg, 0.01 mmol). Then a CH<sub>3</sub>OH solution (4 mL) of [Fe(NCBH<sub>3</sub>)<sub>2</sub>] (0.03 mmol) was carefully layered on top of the buffer layer. After 1 week, yellow plate-like crystals were grown (yield: 5.8 mg, ~ 72.4% based on tpe ligand). The amount of C<sub>2</sub>Cl<sub>4</sub> molecules in the crystal was directly obtained from the single-crystal X-ray diffraction of **1**·2C<sub>2</sub>Cl<sub>4</sub>, consistent with the elemental and thermogravimetric analyses. Elemental analysis calcd (%) for C<sub>28</sub>H<sub>22</sub>B<sub>2</sub>Cl<sub>8</sub>FeN<sub>6</sub>: C 41.77, H, 2.75, N, 10.41; found; C, 41.85, H, 2.76, N, 10.46.

**[Fe<sup>II</sup>(tpe)(NCBH<sub>3</sub>)<sub>2</sub>]**·**2.5CH<sub>3</sub>OH (**1**·2.5CH<sub>3</sub>OH).** In an H-type tube, a 4 mL CH<sub>3</sub>OH solution containing tpe ligand (6.7 mg, 0.02 mmol) was placed on one side, while a 5 mL CH<sub>3</sub>OH solution of [Fe(NCBH<sub>3</sub>)<sub>2</sub>] (0.05 mmol) was placed on the opposite side. Pure CH<sub>3</sub>OH solution was then carefully added to fill the H-type tube completely. After 3 weeks, bright yellow crystals plate-like crystals were obtained.

**Powder X-ray diffraction (PXRD).** PXRD data were recorded on a Bruker D8 ADVANCE diffractometer with Cu K $\alpha$  radiation ( $\lambda$  = 1.5418 Å). All samples were loaded onto a glass sample table featuring a circular groove (diameter ~2 cm, thickness ~1 mm). For the measurement of **1**·2.5CH<sub>3</sub>OH, a PVC film was used to cover the crystalline powder, ensuring that they remained wetted by the CH<sub>3</sub>OH solution throughout the PXRD testing.

**Single-crystal X-ray diffraction (SC-XRD) analyses.** SC-XRD analyses of **1**·2C<sub>2</sub>Cl<sub>4</sub> and the partially desolvated state form **1**·2.5CH<sub>3</sub>OH were performed on a Rigaku Oxford XtaLAB PRO diffractometer equipped with graphite-monochromated Mo K $\alpha$  radiation ( $\lambda$  = 0.71073 Å). The data of **1**·2C<sub>2</sub>Cl<sub>4</sub> were collected at 200 K. The partially desolvated single crystal was obtained from the single crystal of **1**·2.5CH<sub>3</sub>OH without encapsulated crystal oil under a dry N<sub>2</sub> flow in situ for half an hour at room temperature and the data of that were collected with one sample at 200 and 301 K, respectively.

**The fixing method of the single-crystal sample for recording reversible shape changes.** The single-crystal sample, used for recording reversible shape changes (Movie 2 and 3), is affixed to glass wires using AB glue. This AB glue softens at approximately 323 K, rendering it ineffective for securely fixing the samples.

The fully desolvated single crystal was obtained by subjecting the single crystal of **1**·2C<sub>2</sub>Cl<sub>4</sub> to in situ heating at 448 K using a Bruker D8 diffraction with graphite monochromator Mo K $\alpha$  radiation ( $\lambda$  = 0.71073 Å). The data of fully desolvated state **1** were collected at 448 and 298 K, respectively.

All the structures were solved using direct methods and subsequently refined through full-matrix least-squares techniques on  $F^2$  with SHELX program.<sup>[1]</sup> Non-hydrogen atoms underwent anisotropic refinement, while hydrogen atoms were generated geometrically and refined isotropically.

**Magnetic measurement.** Magnetic measurements were conducted using a Quantum Design MPMS XL-7 magnetometer, operating within the temperature range of 2–400 K and a sweeping rate of 1 K min<sup>-1</sup> under a magnetic field of 5000 Oe. For crystalline powders of **1**·2C<sub>2</sub>Cl<sub>4</sub>, measurements were performed following a temperature cycle of 300–2–300 K. Initially, the crystalline powders were heated in a vacuum oven at 500 K for one hour, then enveloped in plastic film and secured within a straw. Subsequent heating at 395 K for one hour in the SQUID chamber, after which the desolvated samples from **1**·2C<sub>2</sub>Cl<sub>4</sub> were measured over a temperature cycle of 300–2–300 K. The magnetic properties of **1**·2.5CH<sub>3</sub>OH were evaluated with a temperature cycle of 300–2–350 K while immersed in a small amount of CH<sub>3</sub>OH solution. The magnetic chamber was subsequently heated to 395 K for one hour to facilitate in situ loss of the surface solvent and guest molecules, followed by a reduction to 300 K, and measurements were taken over a temperature cycle of 300–2–300 K.

**Variable-temperature FTIR spectra.** In situ Diffuse Reflectance Infrared Fourier Transform Spectroscopy (DRIFTS) measurements were performed using a Bruker Vertex 70 spectrometer. The samples were placed in a sample tank. During the measurement process, the crystalline powders of **1**·2C<sub>2</sub>Cl<sub>4</sub> were heated under N<sub>2</sub> flow (10 mL min<sup>-1</sup>) from 293 to 503 K for 2 hours, and the data were collected within the temperature range of 350–503 K. The crystalline powders of **1**·2.5CH<sub>3</sub>OH underwent heating under N<sub>2</sub> flow (10 mL min<sup>-1</sup>) from 293 to 423 K for 1.5 hours, and the data were acquired within the temperature range of 310–423 K.

**Thermogravimetric (TGA) Analyses.** TGA measurements were recorded under a nitrogen flow (20 mL min<sup>-1</sup>) on a NETZSCH TG 209 thermobalance in a temperature range of 20–600°C with rates of 5°C min<sup>-1</sup> from 20 to 200°C, 10°C min<sup>-1</sup> from 200 to 400°C, and 20°C min<sup>-1</sup> from 400 to 600°C.

**Pure Gas Adsorption Tests.** The nitrogen adsorption isotherms and pore size distribution were determined using a Kubo-X1000 Analyzer. Gas sorption isotherms were conducted on a Micromeritics (3FLEX) apparatus. Prior to gas measurement, the **1**·2.5CH<sub>3</sub>OH samples were subjected to degassing at 100°C under dynamic vacuum conditions for 2 hours to ensure complete activation.

**Dynamic Breakthrough Tests.** Breakthrough experiments were carried out using a custom-made dynamic gas breakthrough apparatus. A stainless steel column (4.6 mm inner diameter × 50 mm), filled with 0.4242 g of fully activated sample, was employed for the experiments. The flow rate of the gas through the system was controlled by a mass flow controller. The effluent gas from the column was monitored at 30-second intervals using gas chromatography (Agilent 7890B) equipped with a thermal conductivity detector (TCD). Following each separation experiment, the sample was regenerated through heating at 50°C under vacuum for 30 minutes.

**IAST adsorption selectivity calculation:** The experimental isotherm data for pure C<sub>2</sub>H<sub>2</sub>, C<sub>2</sub>H<sub>4</sub>, and CH<sub>4</sub> (measured at 273 K) were fitted using a Langmuir-Freundlich (L-F) model:

$$q = \frac{a * b * p^c}{1 + b * P^c}$$

Where  $q$  and  $p$  are adsorbed amounts and pressures of component  $i$ , respectively.

Using the pure component isotherm fits, the adsorption selectivity is defined by

$$S_{ads} = \frac{q_1 / q_2}{p_1 / p_2}$$

Where  $q_i$  is the amount of  $i$  adsorbed and  $p_i$  is the partial pressure of  $i$  in the mixture.

We used the following written codes to simulate the adsorption selectivity of  $C_2H_2/CO_2$  in **Fig. 6**:

```

28          # No. of Pressure Point

y1, y2      # Molar fraction of binary mixture (y1 and y2, y1 + y2 = 1)

1, 2, 3, 4, 5, 6, 7, 8, 9, 10, 20, 30, 40, 50, 60, 70, 80, 90, 100, 101, 102, 103, 104, 105, 106, 107, 108, 109 #The unit is same parameter b, kPa

a1, a2      # fitting parameter Nsat (A1) for both component (Unit: mmol/g)

b1, b2      # fitting parameter b1 for both components (Unit: kPa-1)

c1, c2      # fitting parameter c1 for both components

0, 0        # fitting parameter Nsat2(A2) for both component(Unit: mmol/g)

0, 0        # fitting parameter b2 for both components (Unit: kPa-1)

1, 1        # fitting parameter c2 for both components

```

**Standardization of the C–H and B–H bond lengths.** The  $C_6NH_5 \cdot NCBH_3^-$  portion with normalised C–H (1.09 Å) and B–H (1.21 Å) bonds were modelled with AutoCAD software. The coordinates of the hydrogen atom were obtained by the model and hydrogen atoms were generated by Material studios.

**Computational Details.** The Young's modulus ( $E$ ) of the desolvated state 1 was calculated using the Cambridge Serial Total Energy Package (CASTEP) module within Materials Studio. This computational method employs Density Functional Theory (DFT) to predict material properties at the atomic scale. The flexibility matrix ( $S$ ) was computed utilizing CASTEP, and the resulting data were used to illustrate the anisotropy of Young's modulus in three dimensions via MATLAB software<sup>[2]</sup>.

All Gas adsorption simulations were performed using the Sorption model, within the Compass III force field. The electrostatic and van der Waals were Ewald and Atom based respectively. The adsorption process was simulated at 298 K and 1 bar. The generalized gradient approximation (GGA) method with Perdew-Burke-Ernzerhof (PBE) function was employed to describe the interactions between core and electrons. The force and energy convergence criterion were set to 0.002 Ha Å<sup>-1</sup> and 10<sup>-5</sup> Ha, respectively. The elastic constants were calculated via CASTEP model with energy cutoff of 380 eV.

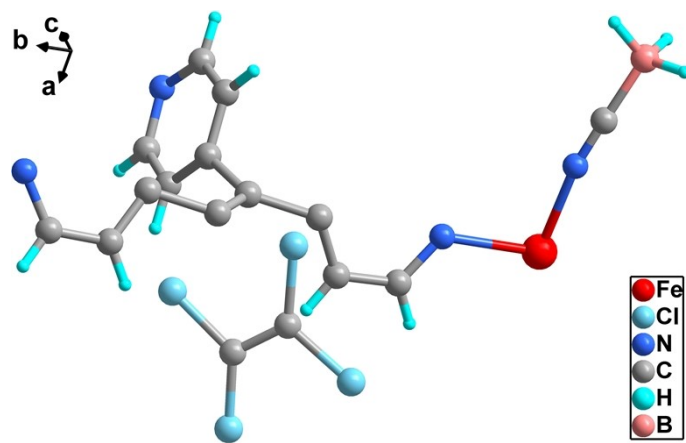

Figure S1. The asymmetric unit of  $1 \cdot 2C_2Cl_4$ .

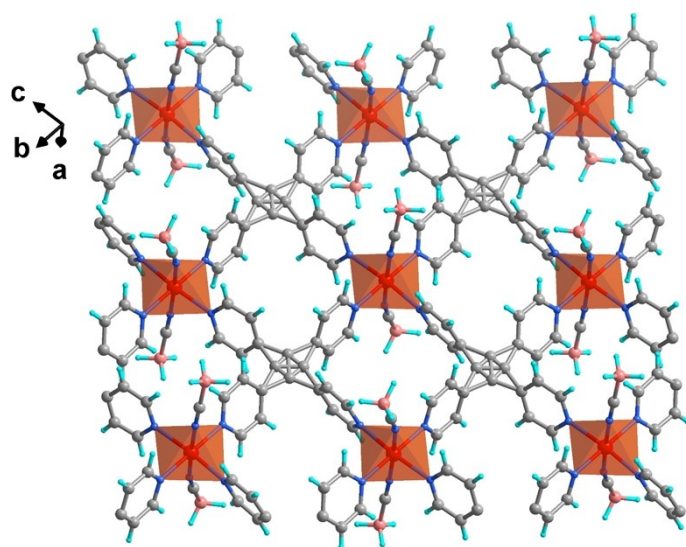

Figure S2. The Coordination mode of  $Fe^{2+}$  ions in  $1 \cdot 2C_2Cl_4$ .

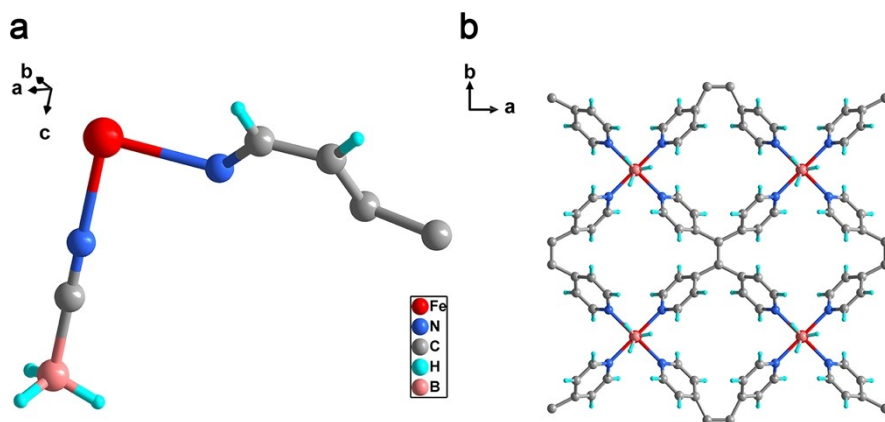

Figure S3. The asymmetric unit (a) and the 2D layer structure (b) of the partially desolvated state by  $1 \cdot 2.5CH_3OH$ .

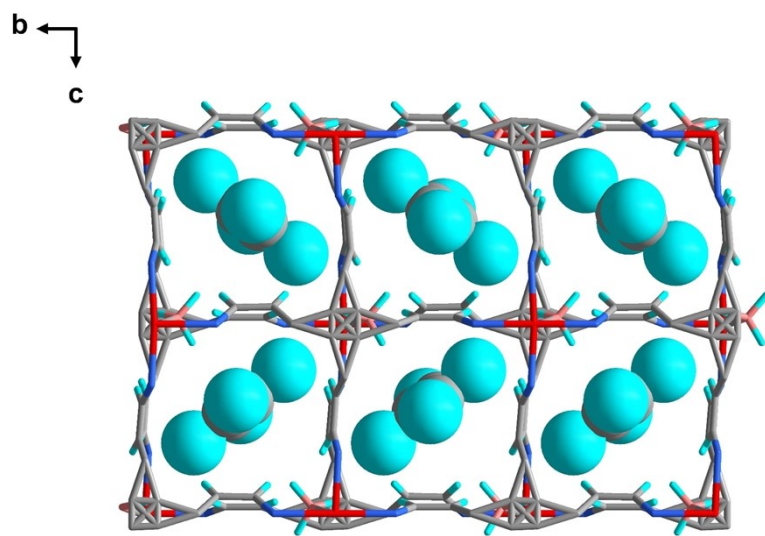

**Figure S4.** The arrangement of  $C_2Cl_4$  molecules in adjacent layers of  $1 \cdot 2C_2Cl_4$ .

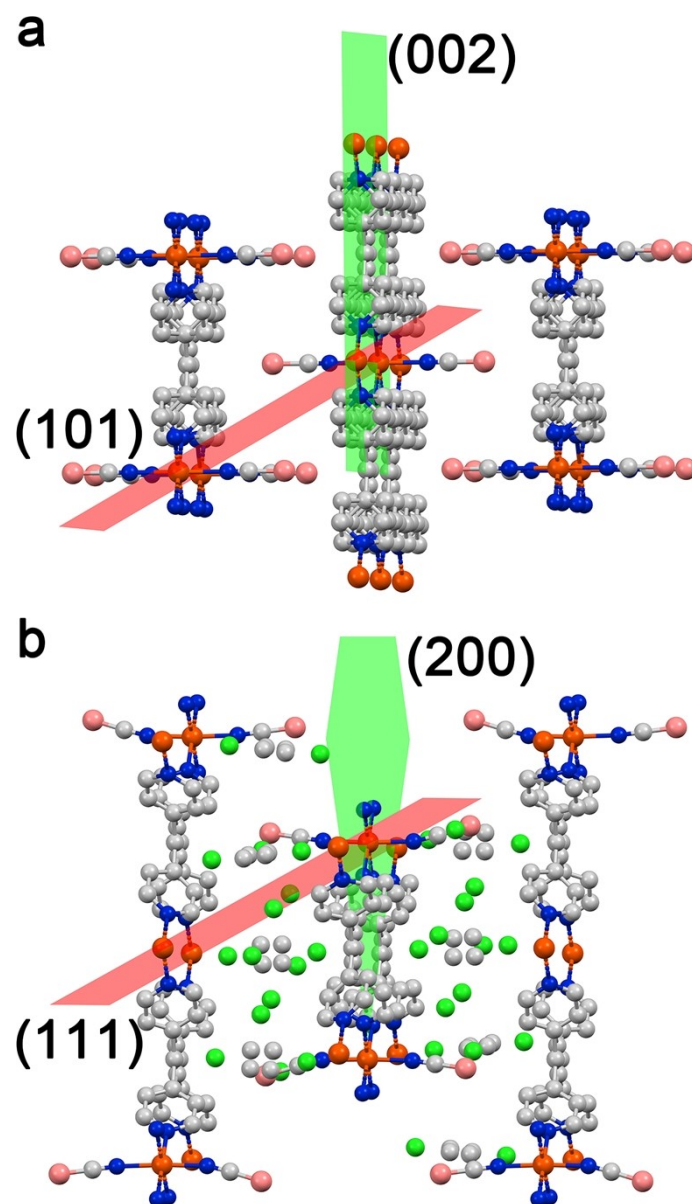

**Figure S5.** The selected planes in the crystal structure. **a** The (002) and (101) planes of the desolvated state **1**. **b** The (200) and (111) planes of **1·2C<sub>2</sub>Cl<sub>4</sub>**.





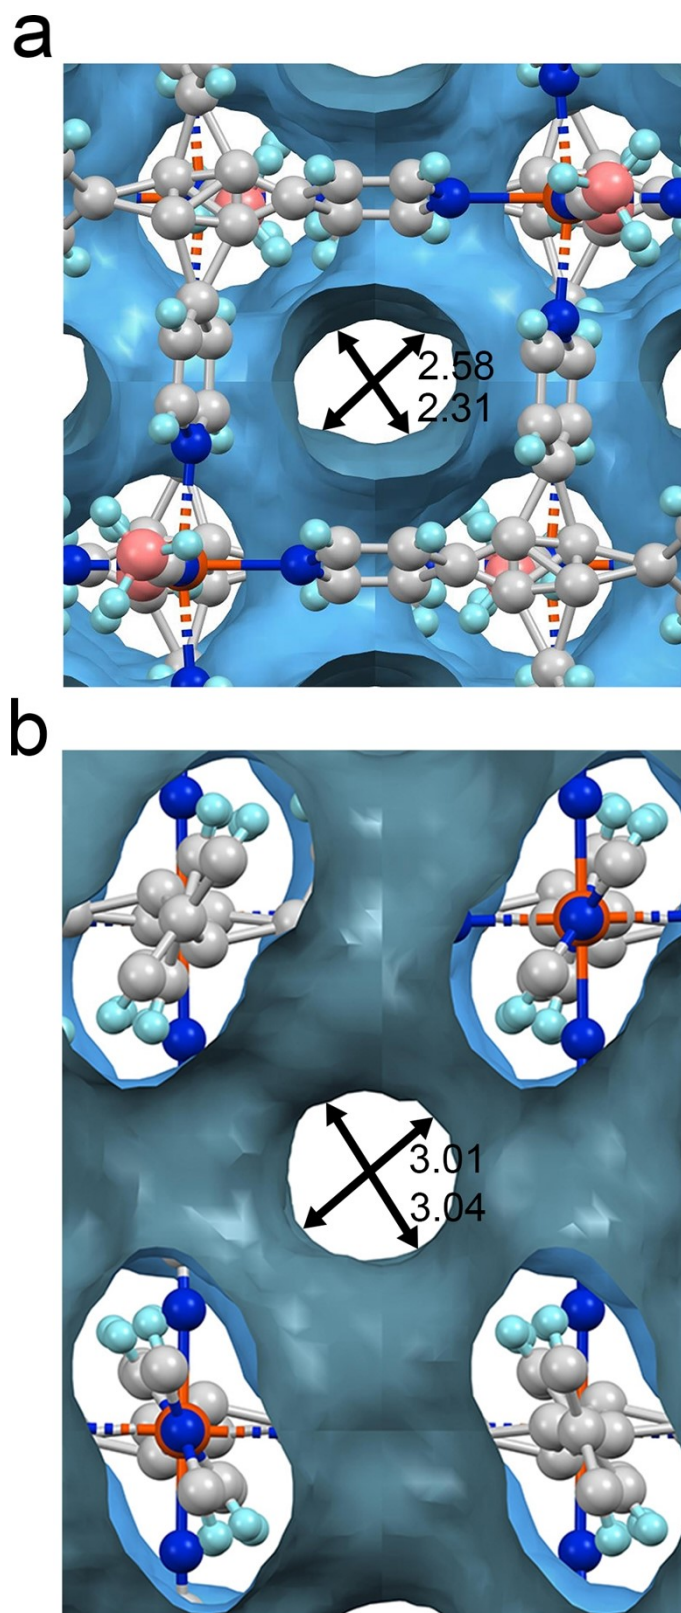

**Figure S8. The circular windows of  $1 \cdot 2\text{C}_2\text{Cl}_4$  along two directions.** Calculations performed with PLATON indicate that the accessible voids in the compound  $1 \cdot 2\text{C}_2\text{Cl}_4$  after removal of  $\text{C}_2\text{Cl}_4$  molecules constitutes about 44.4% per cent unit cell. The cavity deformation and increased capacity suggest that the  $\text{C}_2\text{Cl}_4$  guest molecules exert an expansive effect on the framework of **1**.

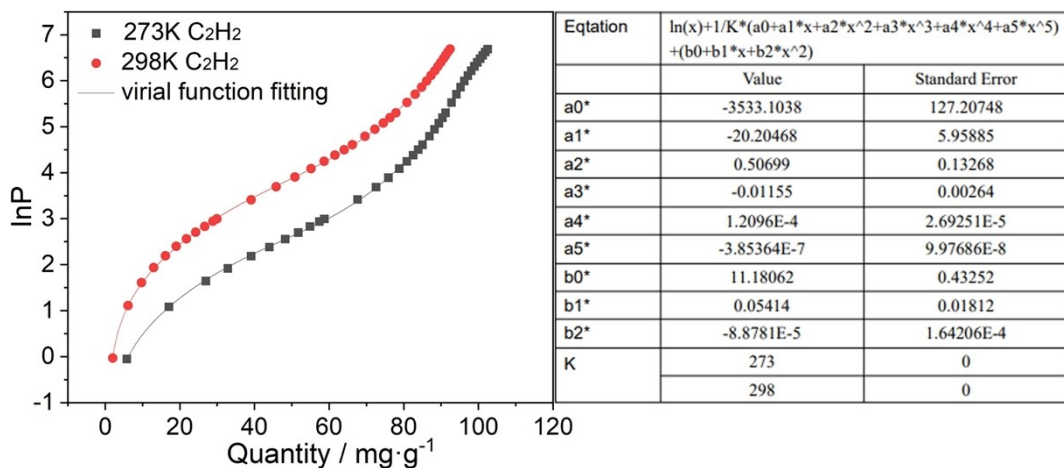

Figure S9. C<sub>2</sub>H<sub>2</sub> fit isotherms of 1 at 273 K and 298 K by virial equation.

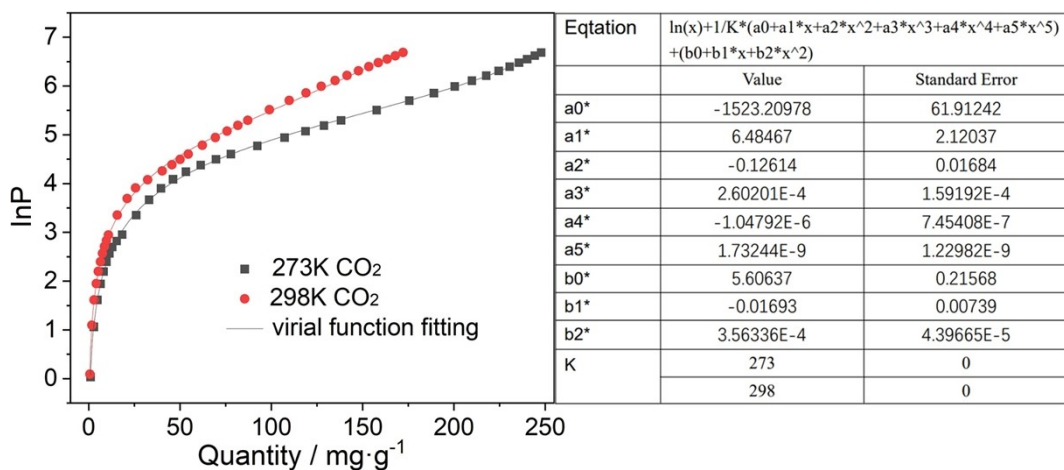

Figure S10. CO<sub>2</sub> fit isotherms of 1 at 273 K and 298 K by virial equation.

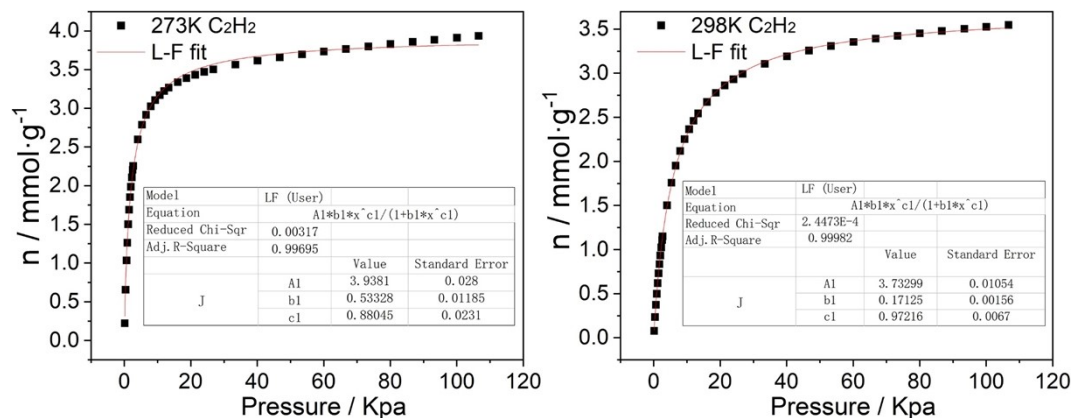

Figure S11. C<sub>2</sub>H<sub>2</sub> fit isotherm of 1 at 273 and 298 K by L-F model.

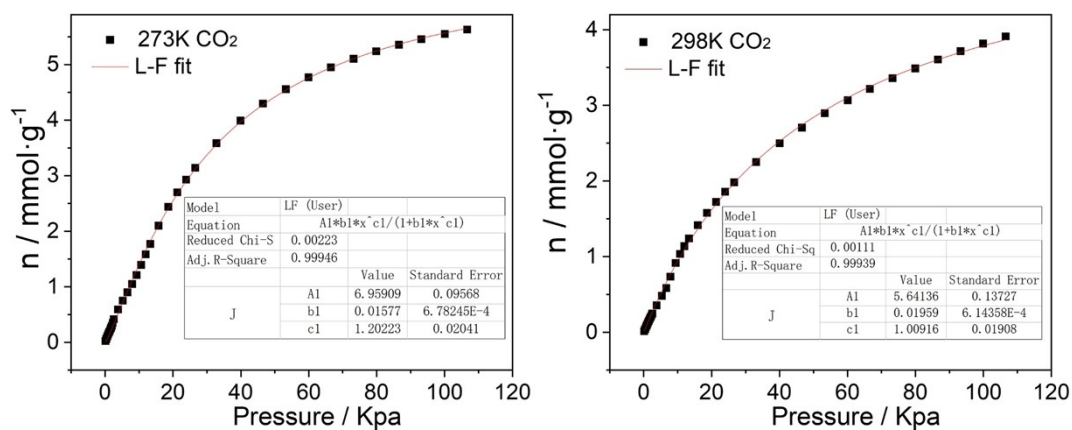

Figure S12. CO<sub>2</sub> fit isotherm of 1 at 273 and 298 K by L-F model.

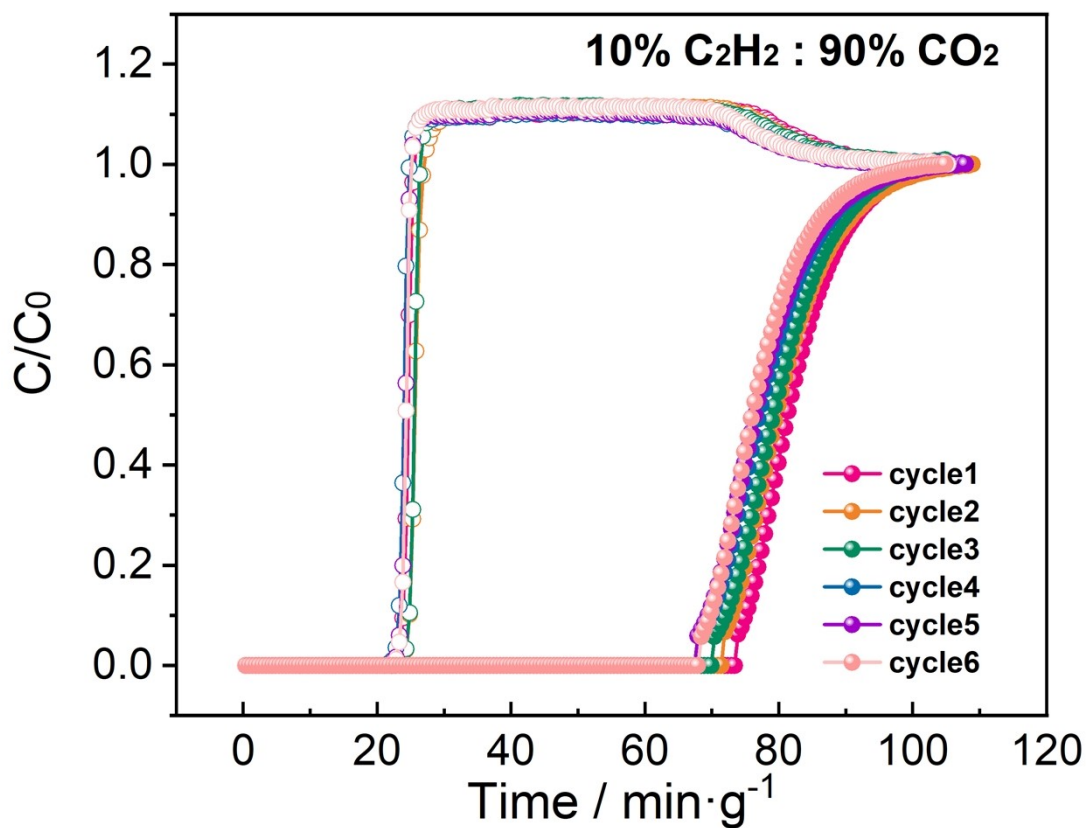

Figure S13. The cyclic breakthrough curves for 1/9 binary C<sub>2</sub>H<sub>2</sub>/CO<sub>2</sub>. The breakthrough experiment cyclability (6 times) for the C<sub>2</sub>H<sub>2</sub>/CO<sub>2</sub> (1/9, v/v) mixture with a gas flow rate of 2 mL min<sup>-1</sup> at 298 K.

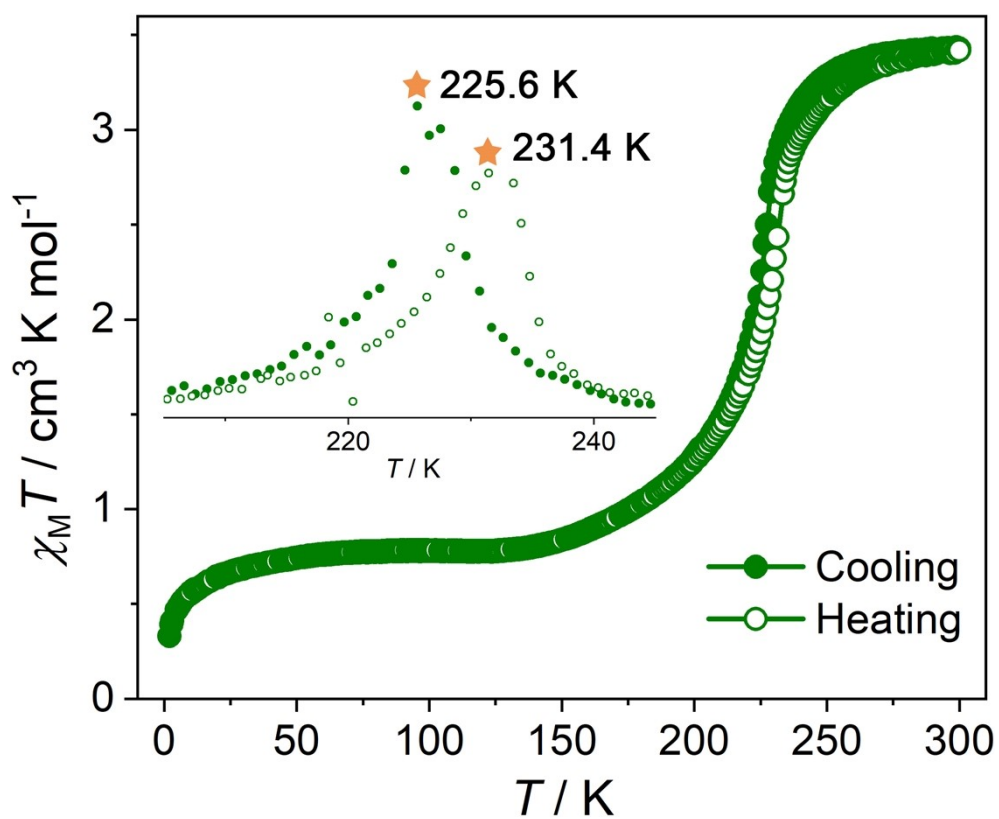

Figure S14. Thermal hysteresis loop of 5.8 K for 1. (inset: derivative of  $\chi_M T$  versus  $T$  curve)

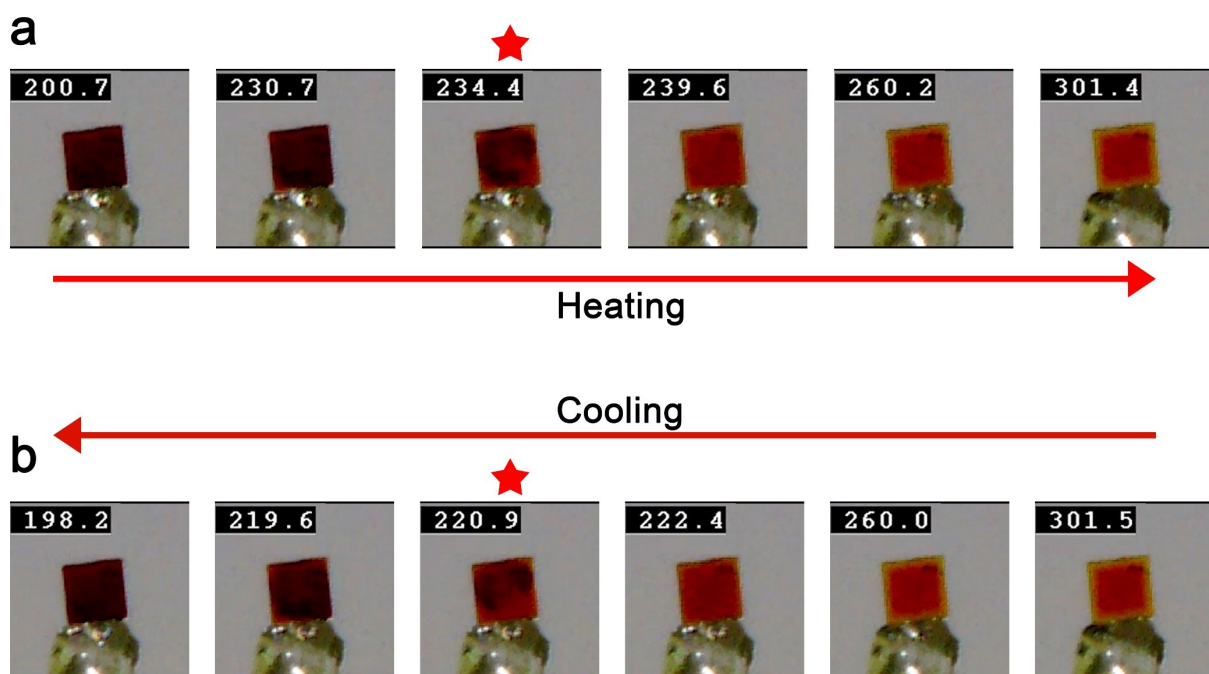

Figure S15. The slight thermal hysteresis loop that showed in photographs of the free crystal during the two cycles of heating and cooling in video 2.

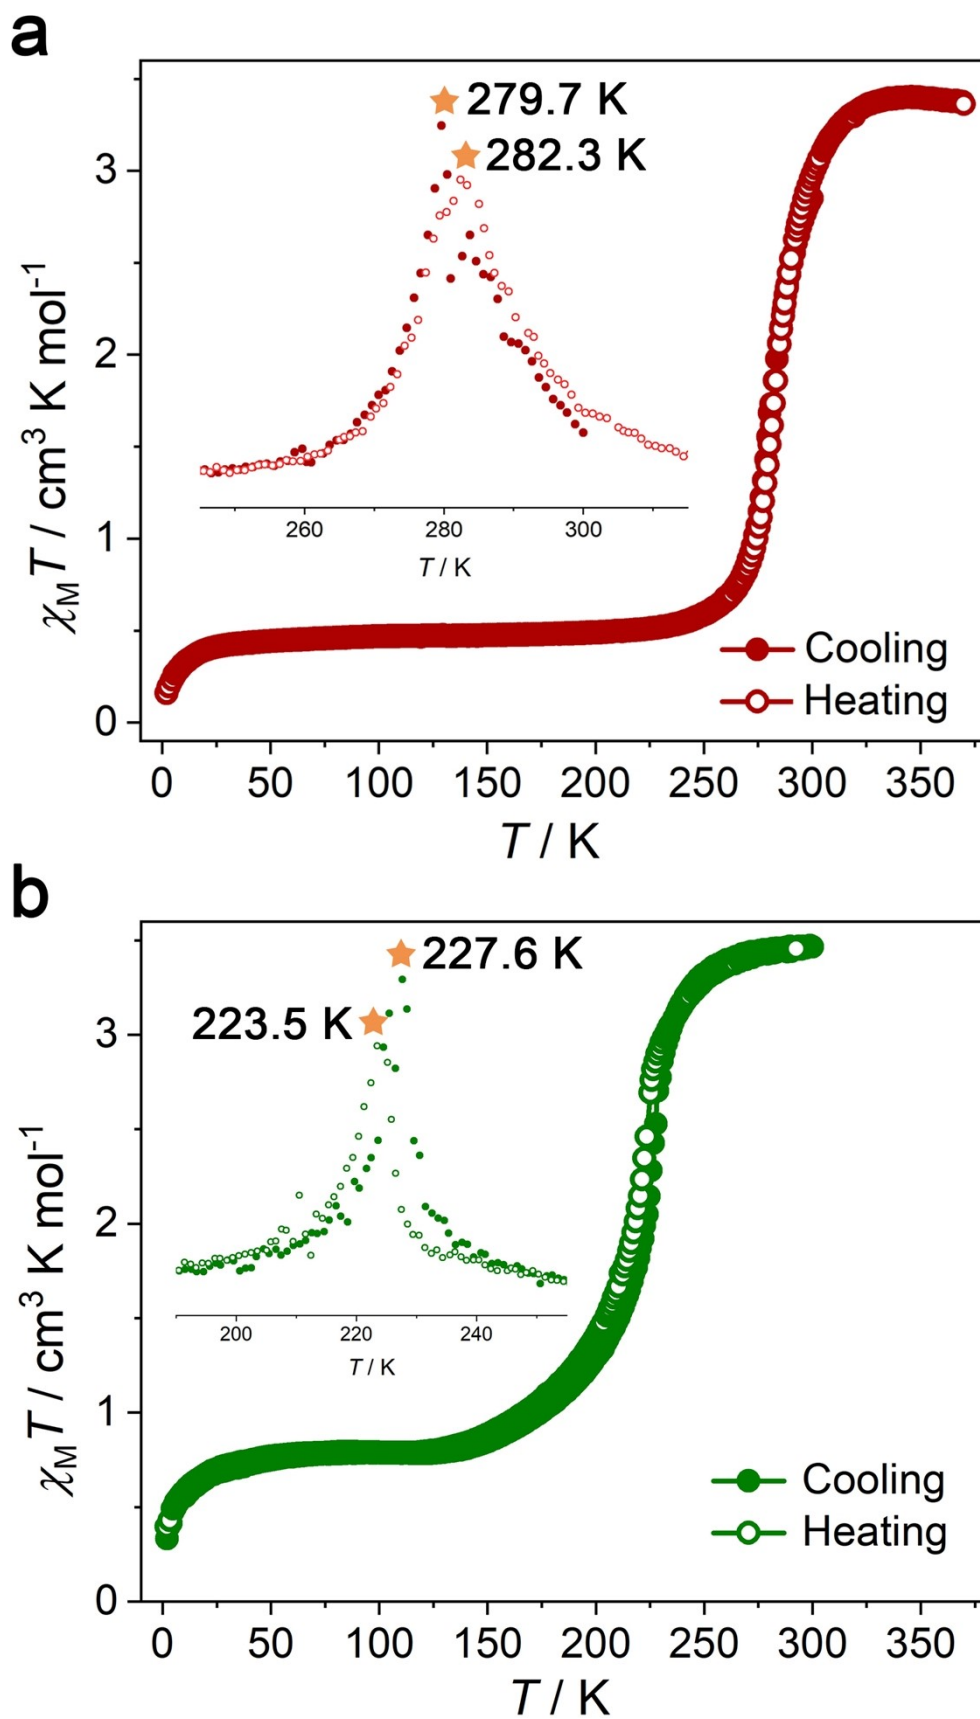

Figure S16. Thermal hysteresis loop of 2.6 K for 1-2.5CH<sub>3</sub>OH and of 4.1 K for 1. (inset: derivative of  $\chi_M T$  versus  $T$  curve).



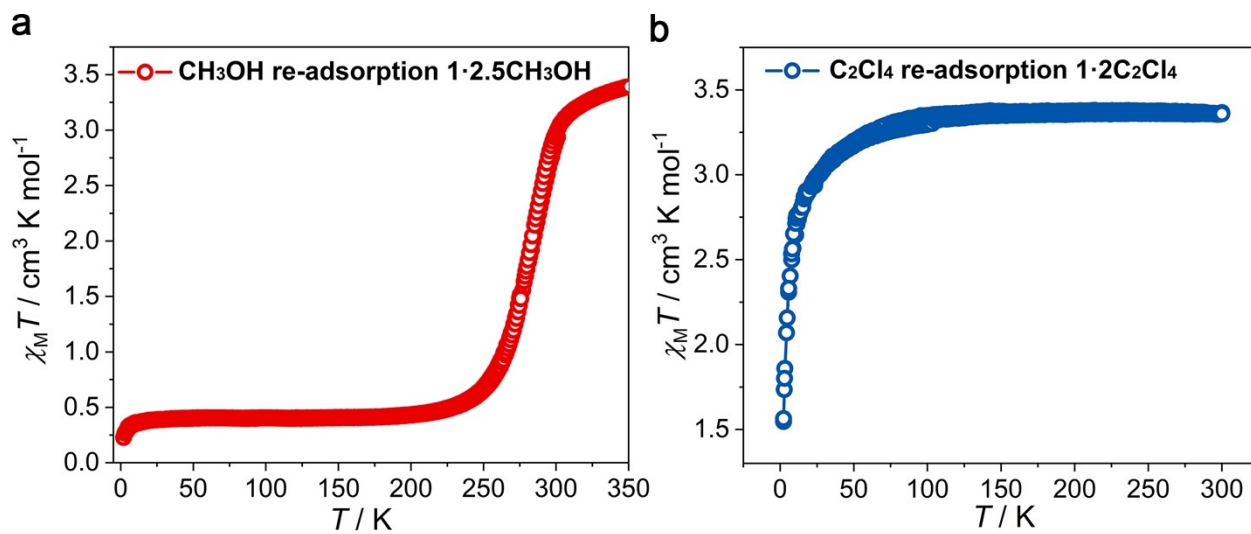

Figure S17. Temperature-dependence of the  $\chi_M T$  values of  $\text{CH}_3\text{OH}$  (a) and  $\text{C}_2\text{Cl}_4$  (b) re-adsorption samples.

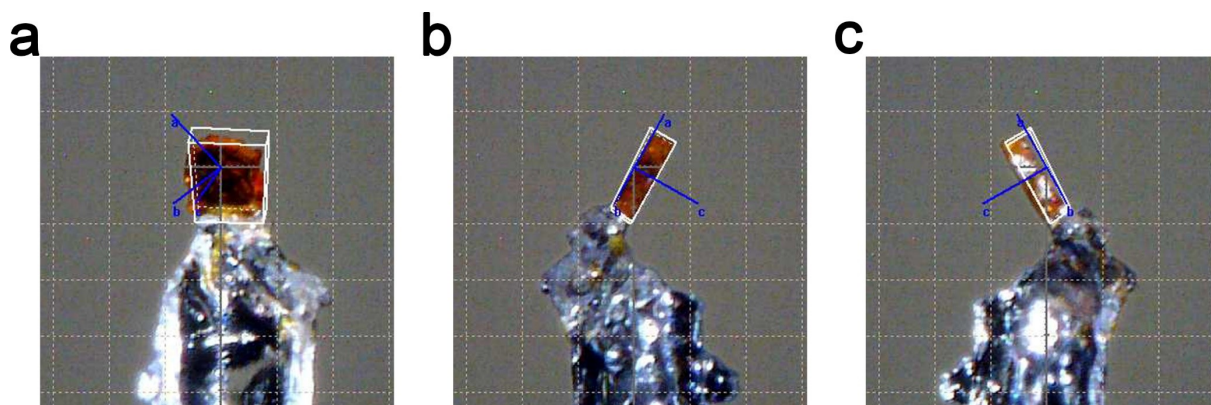

Figure S18. The face index of single crystal of the partially desolvated state by 1·2.5 $\text{CH}_3\text{OH}$ .

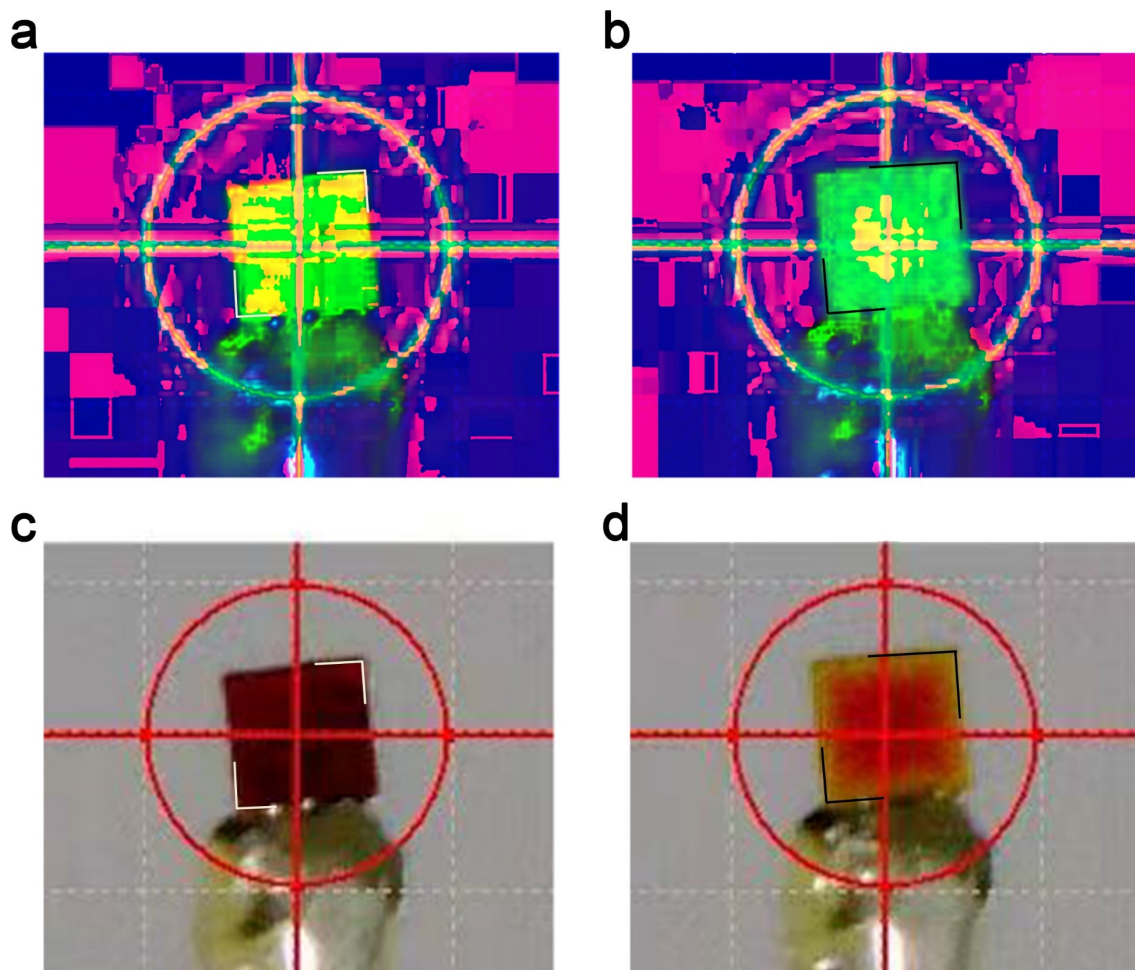

**Figure S19.** The rule for dimensioning the free crystal. The photograph converted by HSB filter for the free crystal of the partially desolvated state by  $1 \cdot 2.5\text{CH}_3\text{OH}$  at 198 (a) and 301 K (b). The original photograph for the free crystal at 198 (c) and 301 K (d).

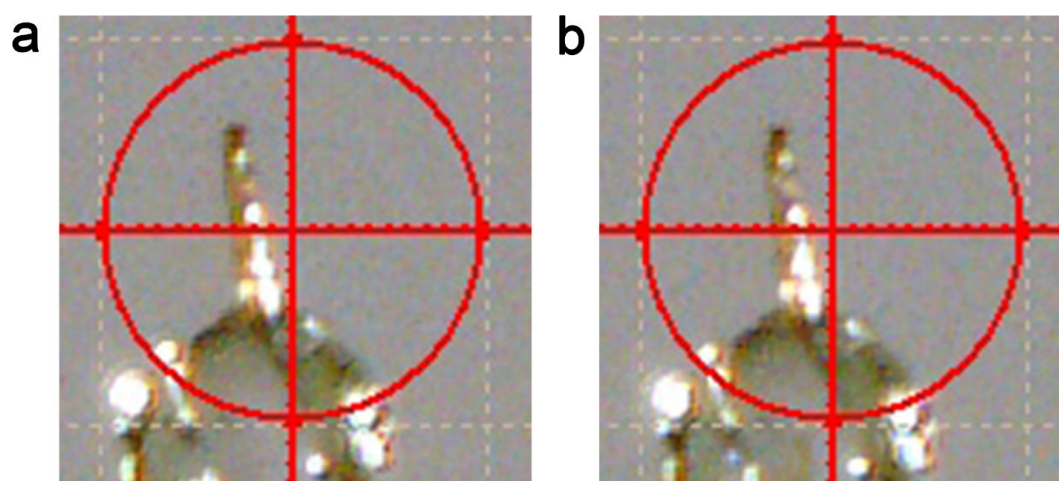

**Figure S20.** The side-view photograph of the free crystal before (a) and after (b) undergoing two cycles of heating and cooling.

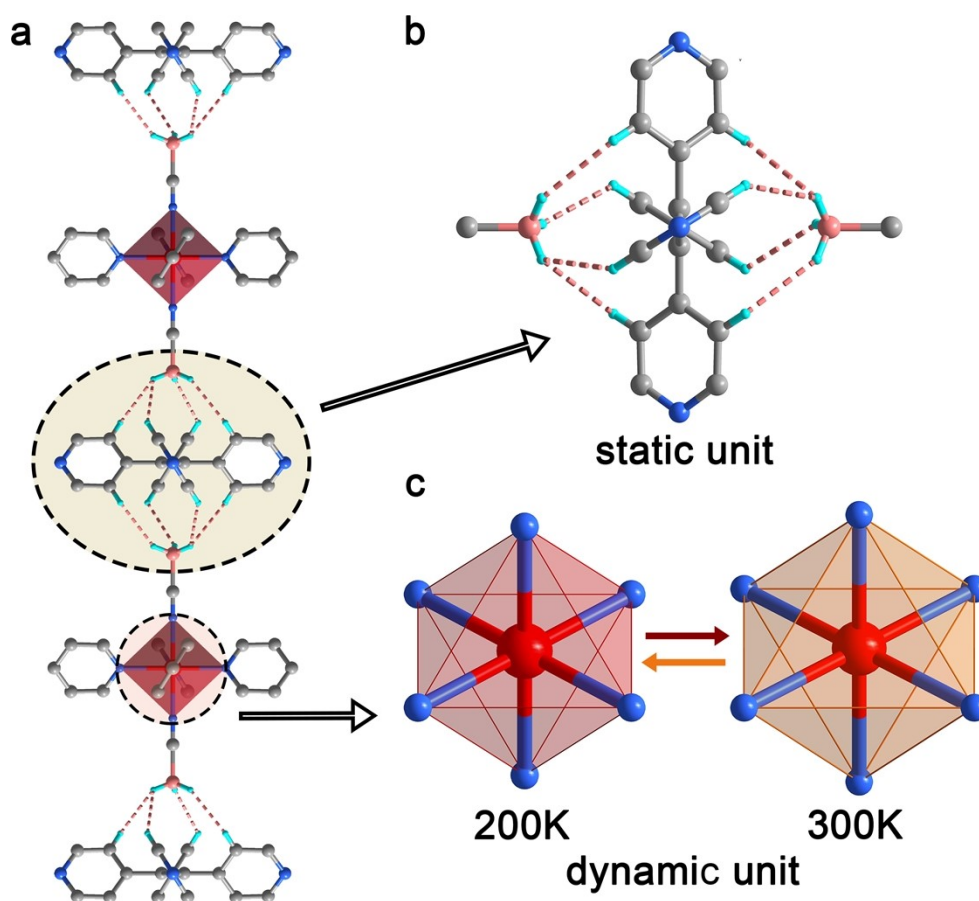

**Figure S21.** The static and dynamic units of the partially desolvated state by 1·2.5CH $_3$ OH upon macroscopic shape change in the free crystal. The 2D layers stacked in ABAB mode are stabilized by pillared multiple C-H $\cdots$ H $\cdots$ B DHBs to form the 3D supramolecular structure (a), with the ligand bound by DHBs serving as a static unit (b) and the SCO behavior of the linked Fe $^{2+}$  metal center acting as a dynamic unit (c).

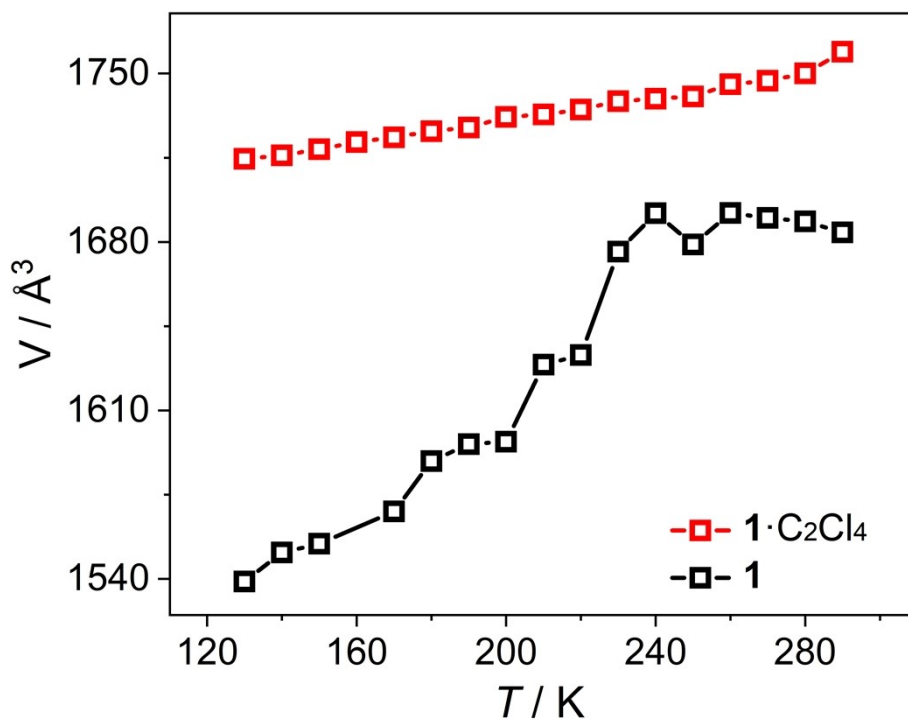

**Figure S22.** The comparison of temperature-dependent unit-cell volume in 1·2C $_2$ Cl $_4$  and 1.



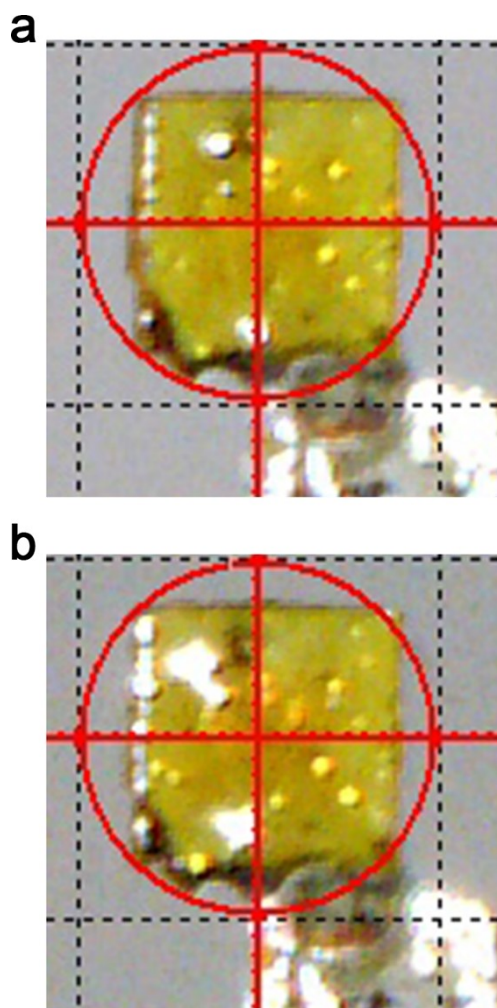

**Figure S23.** The photograph for the free crystal of  $1 \cdot 2\text{C}_2\text{Cl}_4$  at 200 (a) and 300 K (b). The free crystal of  $1 \cdot 2\text{C}_2\text{Cl}_4$  at 200 K was observed to slightly shift downwards, likely due to the shrinkage of rubber cement used for fixing the glass wire under the low temperature gas flow. Upon comparing the sizes of the crystal shapes, it was determined that the effect of conventional thermal expansion on the macroscopic shape is very small.

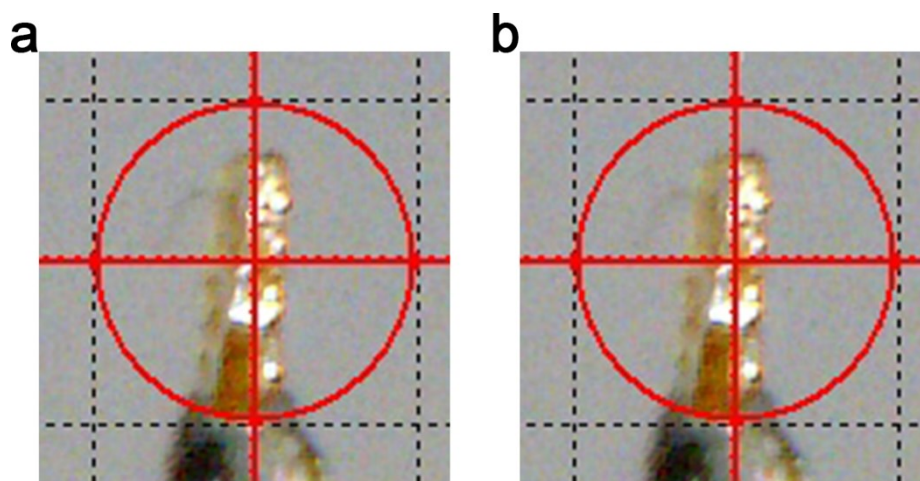

**Figure S24.** The side-view photograph of the free crystal of  $1 \cdot 2\text{C}_2\text{Cl}_4$  before (a) and after (b) undergoing two cycles of heating and cooling.

**Table S1.** Crystal data and structural refinements for 1·2C<sub>2</sub>Cl<sub>4</sub>.

|                                                    | 1·2C <sub>2</sub> Cl <sub>4</sub>                                               |                                                                 |                  |
|----------------------------------------------------|---------------------------------------------------------------------------------|-----------------------------------------------------------------|------------------|
|                                                    | 200                                                                             | 448(desolvation)                                                | 298(desolvation) |
| Temperature/K                                      | 200                                                                             | 448(desolvation)                                                | 298(desolvation) |
| Formula                                            | C <sub>28</sub> H <sub>22</sub> B <sub>2</sub> Cl <sub>8</sub> FeN <sub>6</sub> | C <sub>24</sub> H <sub>22</sub> B <sub>2</sub> FeN <sub>6</sub> |                  |
| <i>M</i> /g mol <sup>-1</sup>                      | 803.58                                                                          | 471.94                                                          |                  |
| Crystal size/mm                                    | 0.15×0.15×0.05                                                                  |                                                                 | 0.07×0.07×0.02   |
| Wavelength/Å                                       | 0.71073                                                                         |                                                                 | 0.71073          |
| Space group                                        | <i>Pbcn</i>                                                                     | <i>I4/mmm</i>                                                   | <i>I4/mmm</i>    |
| Crystal color                                      | yellow                                                                          | yellow                                                          | yellow           |
| Crystal system                                     | orthorhombic                                                                    | tetragonal                                                      | tetragonal       |
| <i>a</i> /Å                                        | 17.9178(8)                                                                      | 9.856(3)                                                        | 9.8528(18)       |
| <i>b</i> /Å                                        | 13.9608(6)                                                                      | 9.856(3)                                                        | 9.8528(18)       |
| <i>c</i> /Å                                        | 13.9443(10)                                                                     | 17.199(8)                                                       | 17.332(6)        |
| <i>α</i> /°                                        | 90                                                                              | 90                                                              | 90               |
| <i>β</i> /°                                        | 90                                                                              | 90                                                              | 90               |
| <i>γ</i> /°                                        | 90                                                                              | 90                                                              | 90               |
| Volume/Å <sup>3</sup>                              | 3488.1(3)                                                                       | 1670.8(13)                                                      | 1682.6(9)        |
| <i>Z</i>                                           | 4                                                                               | 2                                                               | 2                |
| <i>D</i> <sub>c</sub> / g cm <sup>-3</sup>         | 1.530                                                                           | 0.938                                                           | 0.932            |
| <i>μ</i> / mm <sup>-1</sup>                        | 1.076                                                                           | 0.468                                                           | 0.465            |
| <i>F</i> (000)                                     | 1616.0                                                                          | 488.0                                                           | 488.0            |
| <i>θ</i> range/°                                   | 3.456 to 29.227                                                                 | 2.382 to 24.994                                                 | 2.378 to 26.452  |
| Data/restraints/parameters                         | 4291/0/235                                                                      | 460/69/42                                                       | 542/13/42        |
| Goodness-of-fit on <i>F</i> <sup>2</sup>           | 1.052                                                                           | 2.467                                                           | 1.101            |
| Reflections collected                              | 20307                                                                           | 3842                                                            | 4743             |
| <i>R</i> <sub>1</sub> [ <i>I</i> ≥ 2σ( <i>I</i> )] | 0.0487                                                                          | 0.3234                                                          | 0.0850           |
| <i>wR</i> <sub>2</sub> [all data]                  | 0.1281                                                                          | 0.6124                                                          | 0.2437           |
| Largest diff. peak and hole/e.Å <sup>-3</sup>      | 0.73/-0.45                                                                      | 4.44/-1.93                                                      | 1.37/-0.96       |

**Table S2.** Crystal data and structural refinements for the partially desolvated state by 1·2.5CH<sub>3</sub>OH.

|                                                    | The partially desolvated state by 1·2.5CH <sub>3</sub> OH |                                                                 |
|----------------------------------------------------|-----------------------------------------------------------|-----------------------------------------------------------------|
|                                                    | 200                                                       | 301                                                             |
| Temperature/K                                      | 200                                                       | 301                                                             |
| Formula                                            |                                                           | C <sub>24</sub> H <sub>22</sub> B <sub>2</sub> FeN <sub>6</sub> |
| <i>M</i> <sub>r</sub> /g mol <sup>-1</sup>         |                                                           | 471.94                                                          |
| Crystal size/mm                                    |                                                           | 0.1×0.1×0.05                                                    |
| Wavelength/Å                                       |                                                           | 0.71073                                                         |
| Space group                                        | <i>I4/mmm</i>                                             | <i>I4/mmm</i>                                                   |
| Crystal color                                      | red                                                       | yellow                                                          |
| Crystal system                                     | tetragonal                                                | tetragonal                                                      |
| <i>a</i> /Å                                        | 9.5534(5)                                                 | 9.8237(5)                                                       |
| <i>b</i> /Å                                        | 9.5534(5)                                                 | 9.8237(5)                                                       |
| <i>c</i> /Å                                        | 16.771(3)                                                 | 17.274(2)                                                       |
| <i>α</i> /°                                        | 90                                                        | 90                                                              |
| <i>β</i> /°                                        | 90                                                        | 90                                                              |
| <i>γ</i> /°                                        | 90                                                        | 90                                                              |
| Volume/Å <sup>3</sup>                              | 1530.6(3)                                                 | 1667.0(3)                                                       |
| <i>Z</i>                                           | 2                                                         | 2                                                               |
| <i>D</i> <sub>c</sub> / g cm <sup>-3</sup>         | 1.037                                                     | 0.940                                                           |
| <i>μ</i> / mm <sup>-1</sup>                        | 0.511                                                     | 0.469                                                           |
| <i>F</i> (000)                                     | 500.0                                                     | 488.0                                                           |
| <i>θ</i> range/°                                   | 3.873 to 29.013                                           | 3.764 to 29.064                                                 |
| Data/restraints/parameters                         | 580/0/42                                                  | 639/6/42                                                        |
| Goodness-of-fit on <i>F</i> <sup>2</sup>           | 1.174                                                     | 1.086                                                           |
| Reflections collected                              | 3489                                                      | 5015                                                            |
| <i>R</i> <sub>1</sub> [ <i>I</i> ≥ 2σ( <i>I</i> )] | 0.0417                                                    | 0.0462                                                          |
| <i>wR</i> <sub>2</sub> [all data]                  | 0.1151                                                    | 0.1262                                                          |
| Largest diff. peak and hole/e.Å <sup>-3</sup>      | 0.78/-0.36                                                | 0.32/-0.38                                                      |

**Table S3.** The experimental values for selected distances and angles of C-H<sup>δ+</sup>...H<sup>δ-</sup>-B DHBs interactions of 1·2C<sub>2</sub>Cl<sub>4</sub> at 200 K.

| entry | C-H...H-B                  | H...H (Å) | C-H...H (°) | H...H-B (°) |
|-------|----------------------------|-----------|-------------|-------------|
| 1     | C#1 3-H#1 3...H#1 1A-B#1   | 2.3027(3) | 137.309(4)  | 86.204(5)   |
| 2     | C#1 3-H#1 3...H#1 1C-B#1   | 2.2231(1) | 163.911(3)  | 89.902(2)   |
| 3     | C#1 10-H#2 10...H#1 1B-B#1 | 2.3695(2) | 142.726(4)  | 106.257(4)  |
| 4     | C#1 10-H#2 10...H#1 1C-B#1 | 2.5683(2) | 168.054(2)  | 95.762(1)   |
| 5     | C#2 10-H#2 10...H#2 1C-B#2 | 2.5683(2) | 168.054(2)  | 95.762(2)   |
| 6     | C#2 10-H#2 10...H#2 1B-B#2 | 2.3695(4) | 142.726(3)  | 106.257(3)  |
| 7     | C#2 3-H#1 3...H#2 1C-B#2   | 2.2231(1) | 163.911(1)  | 89.902(1)   |
| 8     | C#2 3-H#1 3...H#2 1A-B#2   | 2.3027(4) | 137.309(6)  | 86.204(2)   |

**Table S4.** The experimental values for selected distances and angles of C-H<sup>δ+</sup>...H<sup>δ-</sup>-B DHBs interactions of the desolvated state from 1·2C<sub>2</sub>Cl<sub>4</sub> at 298 K.

| entry | C-H...H-B                | H...H (Å) | C-H...H (°) | H...H-B (°) |
|-------|--------------------------|-----------|-------------|-------------|
| 1     | C#1 3-H#1 3...H#1 1A-B#1 | 2.6326(5) | 111.50(2)   | 105.363(1)  |
| 2     | C#2 3-H#2 3...H#1 1A-B#1 | 2.2859(7) | 146.58(1)   | 127.835(2)  |
| 3     | C#3 2-H#3 3...H#1 1B-B#1 | 2.2413(1) | 123.54(4)   | 131.505(3)  |
| 4     | C#4 3-H#4 3...H#1 1C-B#1 | 2.0895(2) | 135.549(1)  | 147.243(1)  |
| 5     | C#4 3-H#4 3...H#2 1A-B#2 | 2.0895(5) | 135.549(2)  | 147.243(2)  |
| 6     | C#3 2-H#3 3...H#2 1B-B#2 | 2.2413(1) | 123.54(1)   | 131.505(3)  |
| 7     | C#2 3-H#2 3...H#2 1C-B#2 | 2.2859(7) | 146.58(1)   | 127.835(2)  |
| 8     | C#1 3-H#1 3...H#2 1C-B#2 | 2.6326(3) | 111.50(2)   | 105.363(1)  |

**Table S5.** Single-crystal elastic stiffness constants ( $C_{ij}$ 's) of 1. The tetragonal crystal symmetry entails 6 independent elastic coefficients.

| Structure | $C_{11}$ | $C_{12}$ | $C_{13}$ | $C_{33}$ | $C_{44}$ | $C_{66}$ |
|-----------|----------|----------|----------|----------|----------|----------|
| 1         | 13.6     | -33.969  | -45.2365 | -59.905  | 3.69067  | 31.6045  |

**Table S6.** Selected bond lengths and angles for 1·2C<sub>2</sub>Cl<sub>4</sub> at 200 K.

|                         |           |
|-------------------------|-----------|
| Fe1-N1                  | 2.125(1)  |
| Fe1-N2                  | 2.212(3)  |
| Fe1-N3                  | 2.245(2)  |
| Fe1-N4                  | 2.258(3)  |
| N1-Fe1-N2               | 92.34(5)  |
| N1-Fe1-N3               | 90.75(7)  |
| N1-Fe1-N3 <sup>#1</sup> | 89.48(7)  |
| N1-Fe1-N4               | 87.66(5)  |
| N2-Fe1-N3               | 87.15(5)  |
| N3-Fe1-N4               | 92.85(5)  |
| N1-Fe1-N1 <sup>#2</sup> | 175.31(1) |
| N2-Fe1-N4               | 180       |
| N3-Fe1-N3 <sup>#1</sup> | 174.30(9) |

Symmetry codes: #1) 1 - x, 1 - y, 1 - z; #2) 1 - x, + y, 1 / 2 - z.

**Table S7.** Selected bond lengths and angles for the desolvated state **1** by  $1 \cdot 2\text{C}_2\text{Cl}_4$  at different temperature,

|                         | 298 K    | 448 K   |
|-------------------------|----------|---------|
| Fe1–N1                  | 2.234(1) | 2.13(2) |
| Fe1–N2                  | 2.222(6) | 2.13(2) |
| N1–Fe1–N2               | 90.0     | 90.0    |
| N1–Fe1–N1 <sup>#1</sup> | 180.0    | 180.0   |
| N1–Fe1–N2 <sup>#1</sup> | 90.0     | 90.0    |
| N1–Fe1–N2 <sup>#2</sup> | 90.0     | 90.0    |
| N1–Fe1–N2 <sup>#3</sup> | 90.0     | 90.0    |

Symmetry codes: #1)  $1 - x, 1 - y, 1 - z$ ; #2)  $+ y, 1 - x, 1 - z$ ; #3)  $1 - y, + x, + z$ .**Table S8.** Selected bond lengths and angles for the partially desolvated state by  $1 \cdot 2.5\text{CH}_3\text{OH}$  at different temperature.

|                         | 200 K    | 301 K    |
|-------------------------|----------|----------|
| Fe1–N1                  | 1.944(4) | 2.118(5) |
| Fe1–N2                  | 2.006(3) | 2.219(3) |
| N1–Fe1–N2               | 90.0     | 90.0     |
| N1–Fe1–N1 <sup>#1</sup> | 180.0    | 180.0    |
| N1–Fe1–N2 <sup>#1</sup> | 90.0     | 90.0     |
| N1–Fe1–N2 <sup>#2</sup> | 90.0     | 90.0     |
| N1–Fe1–N2 <sup>#3</sup> | 90.0     | 90.0     |

Symmetry codes: #1)  $1 - x, 1 - y, 1 - z$ ; #2)  $1 - y, + x, + z$ ; #3)  $+ y, 1 - x, 1 - z$ .**Table S9.** Selected structural parameters for  $1 \cdot \text{C}_2\text{Cl}_4$ , **1**, and the partially desolvated state by  $1 \cdot 2.5\text{CH}_3\text{OH}$  at different temperatures.

| Compound                                         | $1 \cdot 2\text{C}_2\text{Cl}_4$ | <b>1</b> |          | the partially desolvated state |          |
|--------------------------------------------------|----------------------------------|----------|----------|--------------------------------|----------|
| Temperature/K                                    | 200                              | 448      | 298      | 200                            | 301      |
| $\langle \text{Fe1–N1} \rangle^{[a]}/\text{\AA}$ | 2.125(1)                         | 2.13(2)  | 2.234(1) | 1.944(4)                       | 2.118(5) |
| $\langle \text{Fe1–N2} \rangle^{[a]}/\text{\AA}$ | 2.240(2)                         | 2.13(2)  | 2.222(6) | 2.006(3)                       | 2.219(3) |
| $\Sigma \text{Fe1}^{[b]}/^\circ$                 | 23.3                             | 0        | 0        | 0                              | 0        |
| $\langle \text{Fe1–N–C} \rangle^{[c]}/^\circ$    | 166.30(19)                       | 180      | 180      | 180                            | 180      |

[a] The average Fe–N bond lengths (Å);

[b] Octahedral distortion parameters (°);

[c] Average Fe–N–C angles within Hofmann layer.

## References

- [1] G. M. Sheldrick, *Acta Cryst. C* **2015**, *71*, 3–8.  
 [2] J. F. Nye, *Physical properties of crystals*. Oxford: Clarendon Press, 1985.
